# Supplementary material
Source: publisher figshare collection journal article supplement (https://sage.figshare.com/ndownloader/files/12957275)
Supplement: Supplementary file 1 [file 12957275]

**Supplemental Appendix 1: YOUTH ENGAGEMENT INDICATORS**

|                              | Short Term                                                                                                                                                                                                                                                                                                                                                                                                                                                                                                                                                                                                                                                                                                                                                                                                                                                                                                                 | Intermediate                                                                                                                                                                                                                                                                                                                                                                                                                                                                                                                                                                                                                                                                                                                                                                                                                                                                     | Long Term                                                                                                                                                                                                                                                                                                                                                                                                                                                                                                                                                                                                                                                                    |
|------------------------------|----------------------------------------------------------------------------------------------------------------------------------------------------------------------------------------------------------------------------------------------------------------------------------------------------------------------------------------------------------------------------------------------------------------------------------------------------------------------------------------------------------------------------------------------------------------------------------------------------------------------------------------------------------------------------------------------------------------------------------------------------------------------------------------------------------------------------------------------------------------------------------------------------------------------------|----------------------------------------------------------------------------------------------------------------------------------------------------------------------------------------------------------------------------------------------------------------------------------------------------------------------------------------------------------------------------------------------------------------------------------------------------------------------------------------------------------------------------------------------------------------------------------------------------------------------------------------------------------------------------------------------------------------------------------------------------------------------------------------------------------------------------------------------------------------------------------|------------------------------------------------------------------------------------------------------------------------------------------------------------------------------------------------------------------------------------------------------------------------------------------------------------------------------------------------------------------------------------------------------------------------------------------------------------------------------------------------------------------------------------------------------------------------------------------------------------------------------------------------------------------------------|
| <b>Conditions Indicators</b> | <ul style="list-style-type: none"> <li>Youth participation in trainings, e.g. advocacy or leadership training</li> <li>Existence of separate youth group as part of partnership</li> <li>Stipends and internship opportunities available for youth to work on efforts of partnership</li> <li>Youth-led effort planned (e.g. FEEST, coupon book, bike club)</li> <li>Youth voices included in discussions of work of partnership</li> <li>Existence of youth school teams working on school food and active living efforts</li> <li>Youth receive training in food systems, built environment, community systems change, equity [e.g., common definitions, principles, skill building]</li> <li>Youth coordinator hired as part of collaborative and receives on-going professional development in youth development</li> <li>Collaborative members receive training on Youth Engagement and being adult allies</li> </ul> | <ul style="list-style-type: none"> <li>Youth-led effort underway (e.g., walking audits, community food assessments, business enterprise, advocacy project)</li> <li>Youth opinions actively sought out for input and incorporated into work</li> <li>Shared leadership between adults and youth</li> <li>Youth are trained to be peer educators on food systems and built environments [e.g., presentation, leadership, social media skill building]</li> <li>Youth coordinator serves on collaborative executive or steering committee</li> <li>Sustainable youth recruitment and internship mechanism in place</li> <li>Dedicated youth seats on collaborative steering committee and/or work groups [or mechanism in place to liaison with youth work groups]</li> <li>Youth “scaffolding” of experiences from informational to participatory to skill development</li> </ul> | <ul style="list-style-type: none"> <li>Permanent, paid positions for youth, as part of partnership or with AmeriCorps/FoodCorps, etc.</li> <li>Youth-led effort completed and resulted in sustainable outcomes</li> <li>Youth conduct trainings in food systems and built environment issues for peer s and community members</li> <li>Youth demonstrate job skills for entry-level positions in food-related businesses, built environment organizations</li> <li>Youth serving on community policy making bodies (e.g., advisory groups, funding collaborative)</li> <li>Youth are part of a larger (regional, national) food systems/built environment network</li> </ul> |
